# Supplementary material for: Identification and Expression Analysis of NAC Gene Family in Weeping Trait of Lagerstroemia indica
Source: MDPI journal article supplement (doi:10.3390/plants11162168), 2022-08-21
Supplement: s1 [file s1]

Table S1 Specific primers for RT-PCR of *LiNAC* in *L. indica*

| Gene name      | Primer sequence (5'-3')     |                             |
|----------------|-----------------------------|-----------------------------|
| <i>LiNAC1</i>  | F: CTGGCATCGCACAAAGACGGT    | R: CTCCTCCCATTCCTCTCAA      |
| <i>LiNAC2</i>  | F: ATCCCATTTCCGAGGTCGAT     | R: TTGCCCCGTGGTCTTCCAGT     |
| <i>LiNAC3</i>  | F: TGAGACTACGCATCCCGAAAC    | R: AGCACCCCTCCACTCCACCTT    |
| <i>LiNAC4</i>  | F: TCATACTACCGCAACTGGCACC   | R: CCATTGAAACCGAACCCATCTC   |
| <i>LiNAC5</i>  | F: CCCCATTGCCTAAGGACACG     | R: TGGTTGCTGAGGGAGACGGT     |
| <i>LiNAC6</i>  | F: AAGCAACCAAGAACTGCCAAGC   | R: GCAATCAGGACCCGAACCAC     |
| <i>LiNAC7</i>  | F: GCTCACTTCCGTGGGACAATAC   | R: CACATCAGGTGCCAACTCTTCTT  |
| <i>LiNAC8</i>  | F: ACAAACAAACTCATTAGCGACAGC | R: CTAGGGAGGTGCAAGAACCGT    |
| <i>LiNAC9</i>  | F: AACAACAAGAACGATGAGGACAAC | R: CGATTCCCGCCCATGAAA       |
| <i>LiNAC10</i> | F: CTCAACCAACCCCGACAGGA     | R: CAGCCCATGAAATCGTAGAAAACA |
| <i>LiNAC11</i> | F: CTGGGTCCTGTGCCGATAT      | R: CTTCACTGCTGCTGTTTCATGTTG |
| <i>LiNAC12</i> | F: GAAGTTGCCAGCGGAGTTGT     | R: CGGTTCTGCCCCATGAAAT      |
| <i>LiNAC13</i> | F: TTCTCCAACATTTTCTCCCAACAG | R: GCAGGGCTTTTCAGCATCTTCT   |
| <i>LiNAC14</i> | F: AGCCCTGGGACTTGCCTGAT     | R: TTGGAGCCCGACCTTTGTG      |
| <i>LiNAC15</i> | F: CAGCAATGGAGTTGAAAACGG    | R: CCAATGGCTAAATCTGGAATC    |
| <i>LiNAC16</i> | F: GCGGACCTTTTGGGTTATGC     | R: GAAGATTTTGCTGCTGGAGTGG   |
| <i>LiNAC17</i> | F: GAAAGCGGACTCGTTGGGTT     | R: CGGTTGAATTATCAAGGGTCTCAT |
| <i>LiNAC18</i> | F: GCGGACCTTTTGGGTTATGC     | R: GAAGATTTTGCTGCTGGAGTGG   |
| <i>LiNAC19</i> | F: CTTGCCAGGTGATTTGAGGG     | R: TTCCAGCGACAGGAGCCAT      |
| <i>LiNAC20</i> | F: CTTGCCAGGTGATTTGAGGG     | R: TTCCAGCGACAGGAGCCAT      |
| <i>LiNAC21</i> | F: AGAGTCAATGGTTATGGCATCAGG | R: TAGTAGTTGCGGAAAGCAGTCG   |
