# Supplementary figures and images for: Identification and Expression Analysis of NAC Gene Family in Weeping Trait of Lagerstroemia indica
Source: MDPI journal article supplement (doi:10.3390/plants11162168), 2022-08-21

LiNAC7

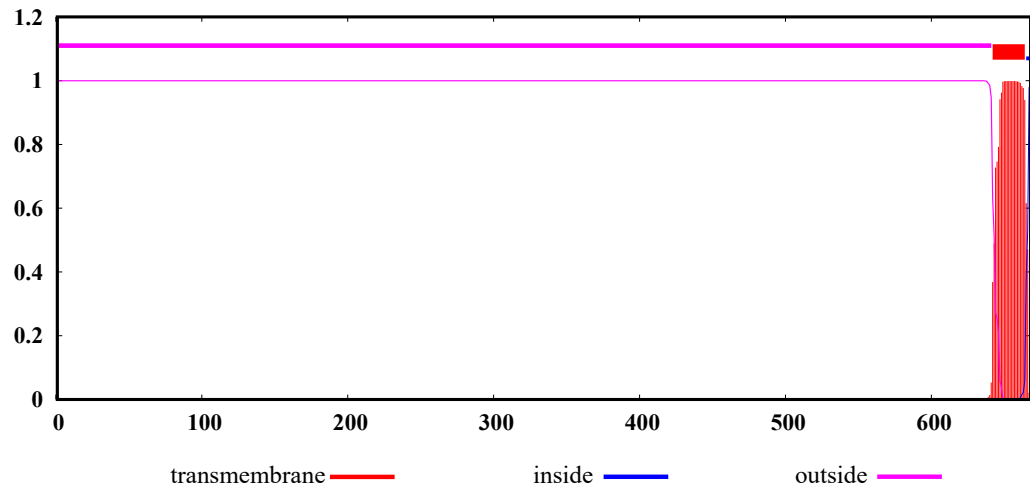

LiNAC16

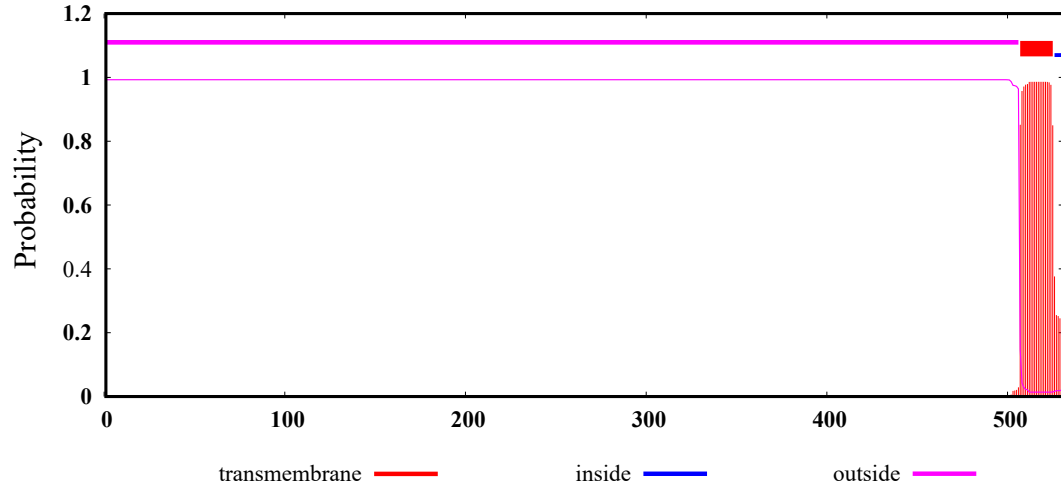

Supplement: s1 [file s1]

Motif 1

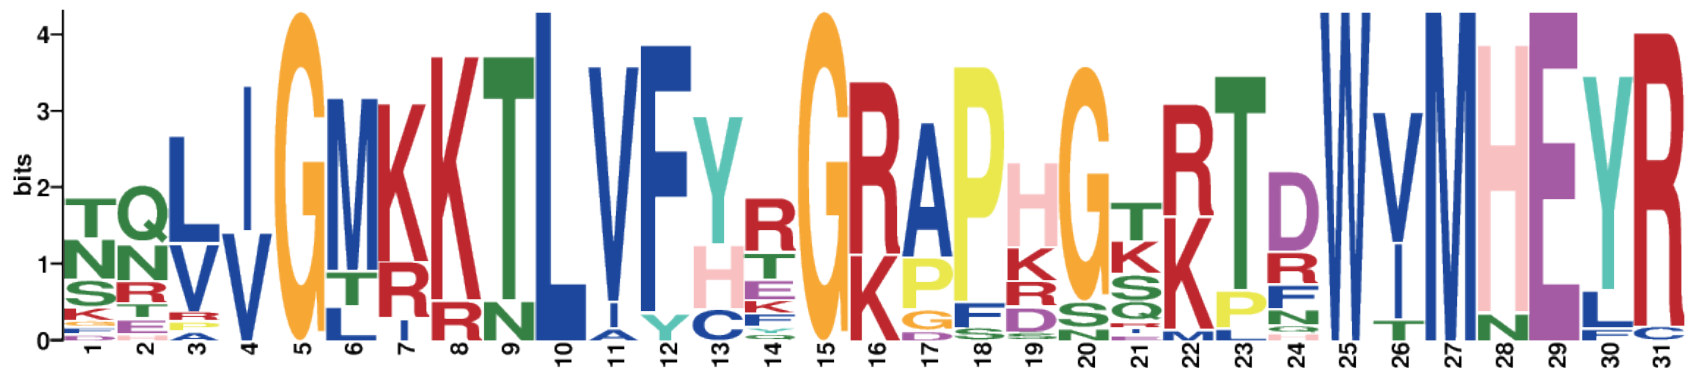

Motif 2

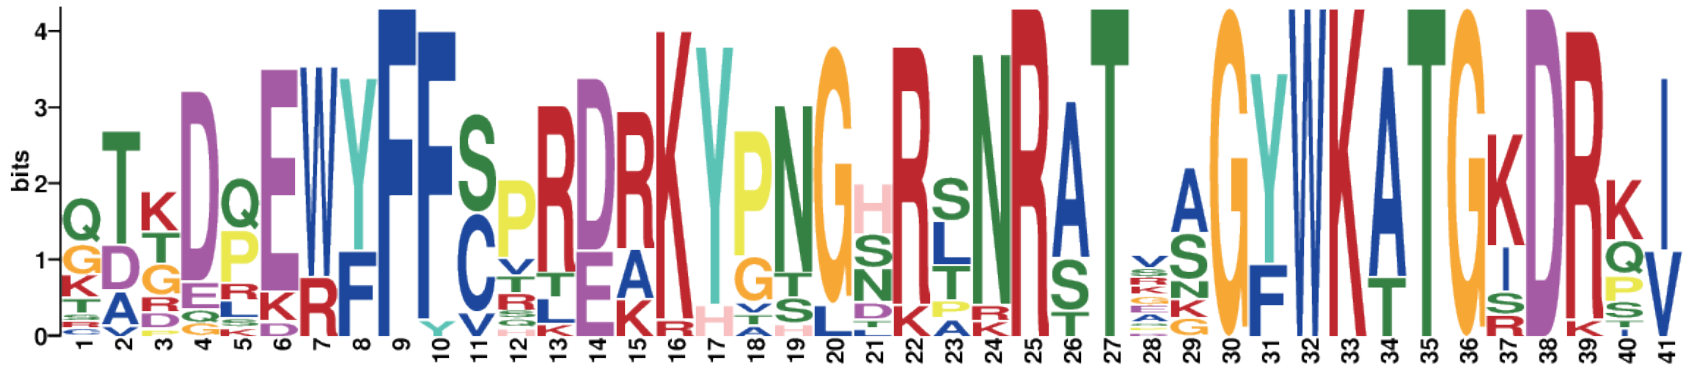

Motif 3

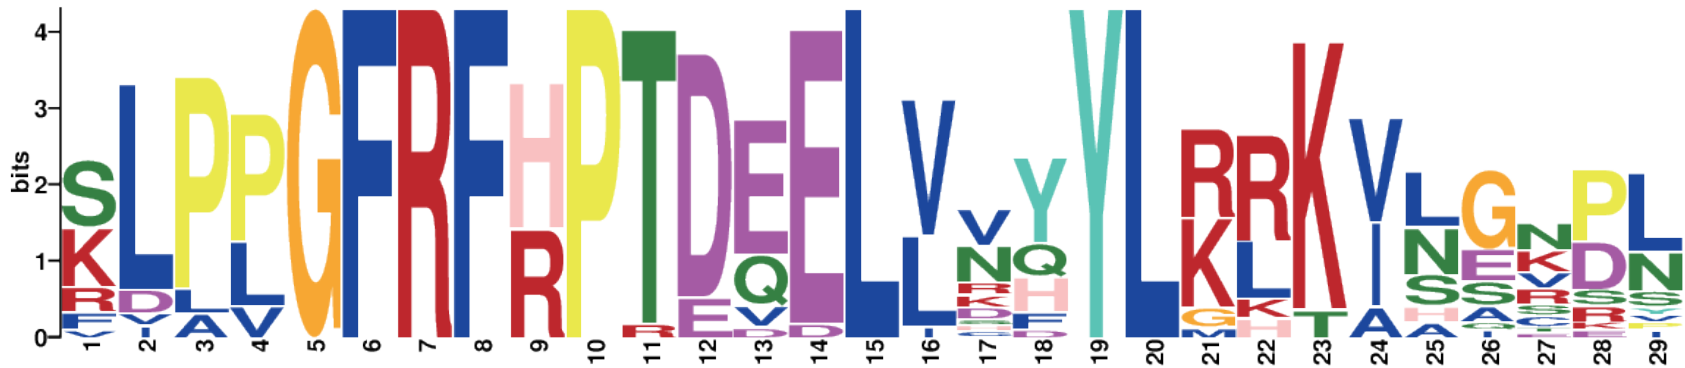

Motif 4

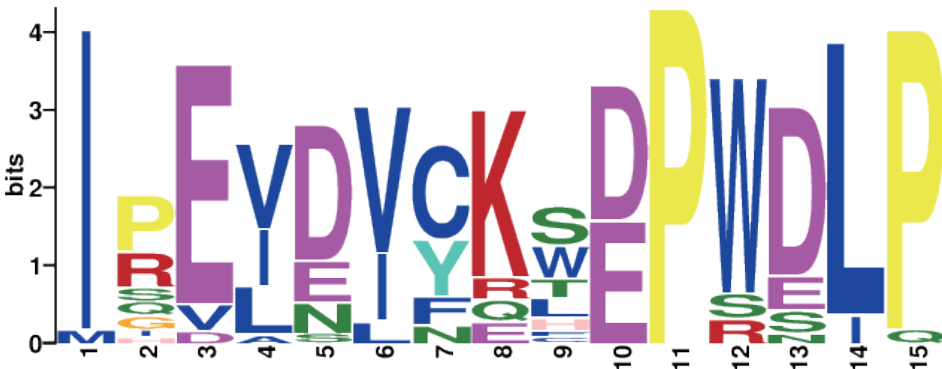

Motif 5

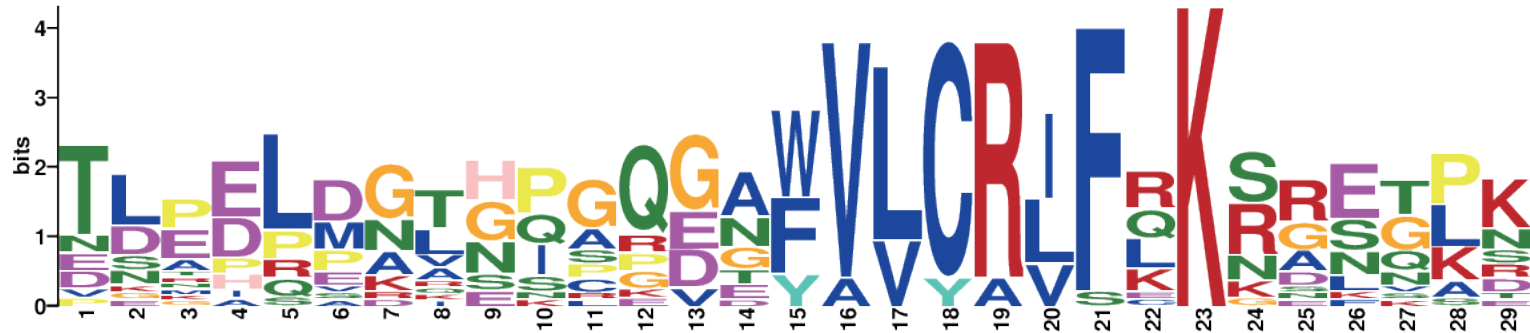

Supplement: s1 [file s1]
